# Supplementary material for: Novel Functional Grape Juices Fortified with Free or Immobilized Lacticaseibacillus rhamnosus OLXAL-1
Source: MDPI journal article supplement (doi:10.3390/microorganisms11030646), 2023-03-02
Supplement: s1 [file s1]

**Table S1.** Minor volatiles (mg/L) detected by HS-SPME GC/MS analysis in grape juice products fortified with freeze-dried free or immobilized *L. rhamnosus* OLXAL-1 cells, after storage at room (20 °C) or refrigeration (4 °C) temperature.

| Compounds detected                        | KI   | Grape Juice | Storage at room temperature (20 °C) |         |         |         |         |         | Storage at refrigeration temperature (4 °C) |         |         |         |         |         |         |         |         |         |
|-------------------------------------------|------|-------------|-------------------------------------|---------|---------|---------|---------|---------|---------------------------------------------|---------|---------|---------|---------|---------|---------|---------|---------|---------|
|                                           |      |             | JF_1d                               | JF_2d   | JF_4d   | Jl_1d   | Jl_2d   | Jl_4d   | JF_1d                                       | JF_2d   | JF_4d   | JF_7d   | JF_10d  | Jl_1d   | Jl_2d   | Jl_4d   | Jl_7d   | Jl_10d  |
| Ethyl acetate                             | <700 | <0.1        | <0.1                                | <0.1    | <0.1    | 0.1±0.1 | 0.1±0.1 | 0.1±0.1 | <0.1                                        | <0.1    | <0.1    | <0.1    | <0.1    | 0.1±0.1 | 0.1±0.1 | 0.1±0.1 | 0.1±0.1 | 0.1±0.1 |
| 2-methyl-1-propanol                       | <700 | <0.1        | <0.1                                | <0.1    | <0.1    | <0.1    | <0.1    | 0.1±0.1 | <0.1                                        | <0.1    | <0.1    | <0.1    | <0.1    | 0.1±0.1 | 0.1±0.1 | 0.1±0.1 | 0.1±0.1 | 0.1±0.1 |
| 3-methyl-butanol                          | <700 | n.d.        | 0.1±0.1                             | 0.1±0.1 | <0.1    | 0.1±0.1 | 0.1±0.1 | 0.1±0.1 | 0.1±0.1                                     | 0.1±0.1 | 0.1±0.1 | 0.1±0.1 | <0.1    | 0.1±0.1 | 0.2±0.1 | 0.2±0.1 | 0.1±0.1 | 0.1±0.1 |
| 2-methyl-butanol                          | <700 | n.d.        | <0.1                                | <0.1    | <0.1    | 0.1±0.1 | 0.1±0.1 | 0.1±0.1 | 0.1±0.1                                     | 0.1±0.1 | 0.1±0.1 | <0.1    | <0.1    | 0.1±0.1 | 0.1±0.1 | 0.1±0.1 | <0.1    | <0.1    |
| 3-methyl-1-butanol                        | 721  | 0.3±0.1     | 0.2±0.1                             | 0.2±0.1 | 0.2±0.1 | 0.3±0.1 | 0.4±0.1 | 0.4±0.2 | 0.2±0.1                                     | 0.2±0.1 | 0.2±0.1 | 0.3±0.1 | 0.3±0.1 | 0.4±0.1 | 0.5±0.2 | 0.5±0.1 | 0.5±0.2 | 0.5±0.1 |
| 2-methyl-1-butanol                        | 722  | 0.2±0.1     | 0.2±0.1                             | 0.2±0.1 | 0.1±0.1 | 0.3±0.1 | 0.3±0.1 | 0.3±0.2 | 0.2±0.1                                     | 0.2±0.1 | 0.2±0.1 | 0.2±0.1 | 0.2±0.1 | 0.2±0.1 | 0.4±0.1 | 0.3±0.1 | 0.2±0.1 | 0.5±0.2 |
| Hexanal                                   | 800  | n.d.        | n.d.                                | n.d.    | n.d.    | 0.1±0.1 | 0.2±0.1 | 0.2±0.1 | n.d.                                        | n.d.    | n.d.    | n.d.    | n.d.    | 0.7±0.1 | 0.7±0.1 | 0.8±0.1 | 0.7±0.2 | 1.0±0.2 |
| Furfural                                  | 835  | 0.9±0.4     | 3.0±0.1                             | 3.2±0.3 | 3.1±0.2 | 2.0±0.2 | 2.3±0.1 | 2.4±0.2 | 1.0±0.1                                     | 1.2±0.1 | 1.1±0.1 | 0.9±0.1 | 1.2±0.1 | 6.0±0.7 | 7.8±0.5 | 7.0±0.4 | 7.3±0.8 | 8.1±0.4 |
| (E)-2-hexenal                             | 854  | n.d.        | n.d.                                | n.d.    | n.d.    | 0.3±0.1 | 0.3±0.1 | 0.3±0.1 | n.d.                                        | n.d.    | n.d.    | n.d.    | n.d.    | 0.5±0.1 | 0.6±0.1 | 0.6±0.1 | 0.7±0.1 | 1.0±0.1 |
| (E)-2-hexen-1-ol                          | 857  | n.d.        | n.d.                                | n.d.    | n.d.    | n.d.    | n.d.    | n.d.    | n.d.                                        | n.d.    | n.d.    | n.d.    | n.d.    | 0.1±0.1 | 0.1±0.1 | 0.1±0.1 | 0.2±0.1 | 0.2±0.1 |
| 1-hexanol                                 | 861  | n.d.        | n.d.                                | n.d.    | n.d.    | 0.1±0.1 | 0.2±0.1 | 0.3±0.1 | n.d.                                        | n.d.    | n.d.    | n.d.    | n.d.    | 0.3±0.1 | 0.2±0.1 | 0.4±0.1 | 0.4±0.1 | 0.5±0.1 |
| 1-(2-furanyl)-ethanone                    | 902  | n.d.        | <0.1                                | 0.1±0.1 | 0.1±0.1 | 0.1±0.1 | 0.1±0.1 | 0.2±0.1 | 0.1±0.1                                     | 0.1±0.1 | 0.1±0.1 | 0.1±0.1 | 0.1±0.1 | 0.4±0.1 | 0.6±0.3 | 0.3±0.1 | 0.4±0.1 | 0.4±0.1 |
| 5-methyl-2-furancarboxaldehyde            | 960  | 0.2±0.1     | 0.3±0.1                             | 0.3±0.1 | 0.4±0.2 | 0.2±0.1 | 0.3±0.1 | 0.3±0.1 | 0.2±0.1                                     | 0.3±0.1 | 0.4±0.2 | 0.2±0.1 | 0.6±0.1 | 1.0±0.2 | 0.9±0.1 | 1.0±0.2 | 1.2±0.1 | 2.0±0.1 |
| 6-methyl-5-hepten-2-one                   | 988  | n.d.        | n.d.                                | n.d.    | n.d.    | 0.3±0.1 | 0.6±0.1 | 0.4±0.1 | n.d.                                        | n.d.    | n.d.    | n.d.    | n.d.    | 0.8±0.2 | 0.6±0.1 | 1.2±0.1 | 2.0±0.1 | 3.1±0.5 |
| Benzeneacetaldehyde                       | 1047 | n.d.        | 0.2±0.1                             | 0.2±0.1 | 0.2±0.1 | 0.1±0.1 | 0.1±0.1 | 0.1±0.1 | 0.1±0.1                                     | 0.1±0.1 | 0.1±0.1 | 0.1±0.1 | 0.2±0.1 | 0.4±0.1 | 0.3±0.1 | 0.4±0.1 | 0.6±0.2 | 0.5±0.2 |
| 3-methyl-benzaldehyde                     | 1059 | n.d.        | <0.1                                | <0.1    | 0.1±0.1 | <0.1    | <0.1    | <0.1    | n.d.                                        | n.d.    | n.d.    | n.d.    | n.d.    | n.d.    | n.d.    | n.d.    | n.d.    | n.d.    |
| Linalool oxide                            | 1073 | n.d.        | n.d.                                | n.d.    | n.d.    | n.d.    | n.d.    | n.d.    | 0.1±0.1                                     | 0.1±0.1 | 0.1±0.1 | 0.1±0.1 | 0.2±0.1 | 0.3±0.1 | 0.2±0.1 | 0.3±0.2 | 0.4±0.1 | 0.5±0.2 |
| 3,7-dimethyl-1,6-octadien-3-ol (linalool) | 1123 | 0.5±0.1     | 0.4±0.2                             | 0.5±0.1 | 0.4±0.1 | 0.1±0.1 | 0.2±0.1 | 0.1±0.1 | 0.2±0.1                                     | 0.3±0.1 | 0.3±0.1 | 0.2±0.1 | 0.3±0.1 | 0.5±0.2 | 0.3±0.1 | 0.6±0.2 | 1.3±0.4 | 0.6±0.1 |
| 2-phenylethanol                           | 1133 | 0.5±0.1     | 0.2±0.1                             | 0.4±0.1 | 0.1±0.1 | 0.1±0.1 | 0.2±0.1 | 0.2±0.1 | 0.1±0.1                                     | 0.1±0.1 | 0.1±0.1 | 0.1±0.1 | 0.3±0.1 | 0.4±0.1 | 0.3±0.1 | 0.7±0.1 | 1.0±0.3 | 0.9±0.2 |
| α-Terpineol                               | 1190 | 0.9±0.1     | 0.9±0.2                             | 0.9±0.1 | 0.8±0.1 | 0.5±0.1 | 0.4±0.1 | 0.5±0.1 | 0.2±0.1                                     | 0.4±0.1 | 0.3±0.1 | 0.2±0.1 | 0.3±0.1 | 1.2±0.1 | 1.0±0.1 | 1.5±0.2 | 1.9±0.2 | 2.0±0.4 |
| Diethyl butanedioate                      | 1191 | 0.1±0.1     | n.d.                                | n.d.    | n.d.    | n.d.    | n.d.    | n.d.    | n.d.                                        | n.d.    | n.d.    | n.d.    | n.d.    | <0.1    | <0.1    | <0.1    | 0.1±0.1 | 0.1±0.1 |
| 1,3-bis(1,1-dimethylethyl)-benzene        | 1258 | 0.1±0.1     | 0.1±0.1                             | 0.1±0.1 | 0.1±0.1 | 0.1±0.1 | 0.1±0.1 | 0.1±0.1 | <0.1                                        | <0.1    | <0.1    | <0.1    | 0.1±0.1 | 0.3±0.1 | 0.4±0.1 | 0.4±0.2 | 0.4±0.2 | 0.5±0.1 |
| 2-phenylethyl acetate                     | 1263 | 1.0±0.2     | 0.6±0.1                             | 0.7±0.2 | 0.6±0.2 | 0.2±0.1 | 0.3±0.1 | 0.3±0.1 | 0.2±0.1                                     | 0.3±0.1 | 0.2±0.1 | 0.2±0.1 | 0.2±0.1 | 1.5±0.2 | 2.0±0.3 | 1.2±0.2 | 1.3±0.1 | 1.4±0.1 |

|                                   |      |      |         |         |         |         |         |         |      |      |      |      |         |         |         |         |         |         |
|-----------------------------------|------|------|---------|---------|---------|---------|---------|---------|------|------|------|------|---------|---------|---------|---------|---------|---------|
| Hexyl hexanoate                   | 1380 | n.d. | n.d.    | n.d.    | n.d.    | 0.3±0.1 | 0.3±0.1 | 0.3±0.1 | n.d. | n.d. | n.d. | n.d. | n.d.    | 0.2±0.1 | 0.5±0.2 | 0.3±0.1 | 0.1±0.1 | 0.4±0.2 |
| 2,4-bis(1,1-dimethylethyl)-phenol | 1516 | n.d. | 0.3±0.1 | 0.3±0.1 | 0.3±0.1 | 0.1±0.1 | 0.1±0.1 | 0.1±0.1 | <0.1 | <0.1 | <0.1 | <0.1 | 0.1±0.1 | 0.2±0.1 | 0.4±0.1 | 0.2±0.1 | 0.2±0.1 | 0.2±0.1 |
| Total                             |      | 4.7  | 6.6     | 7.2     | 6.5     | 5.5     | 6.7     | 6.9     | 2.8  | 3.5  | 3.3  | 2.8  | 4.1     | 15.8    | 18.3    | 18.3    | 20.8    | 24.7    |

KI: Kovats retention index; n.d.: not detected; JF: juice fortified with free cells, JI: juice fortified with immobilized cells on apple pieces. The storage days are shown at the end of the sample code.
